# Supplementary material for: Efficient solar light-driven hydrogen generation using an Sn3O4 nanoflake/graphene nanoheterostructure
Source: Royal Society of Chemistry journal article supplement (doi:10.1039/d1ra05617d), 2021-01-01
Supplement: d1ra05617d1.pdf [file d1ra05617d1.pdf]

## Supporting Information

### Efficient Solar Light Driven Hydrogen generation using $\text{Sn}_3\text{O}_4$ nanoflakes/graphene nanoheterostructure

Yogesh A. Sethi,<sup>a</sup> Aniruddha K. Kulkarni<sup>b</sup>, Anuradha A. Ambalkar<sup>a</sup>, Rajendra P. Panmand,<sup>a</sup> Milind V. Kulkarni, Suresh W. Gosavi,<sup>c\*</sup> Bharat B. Kale <sup>a\*</sup>

Figure ESI -1

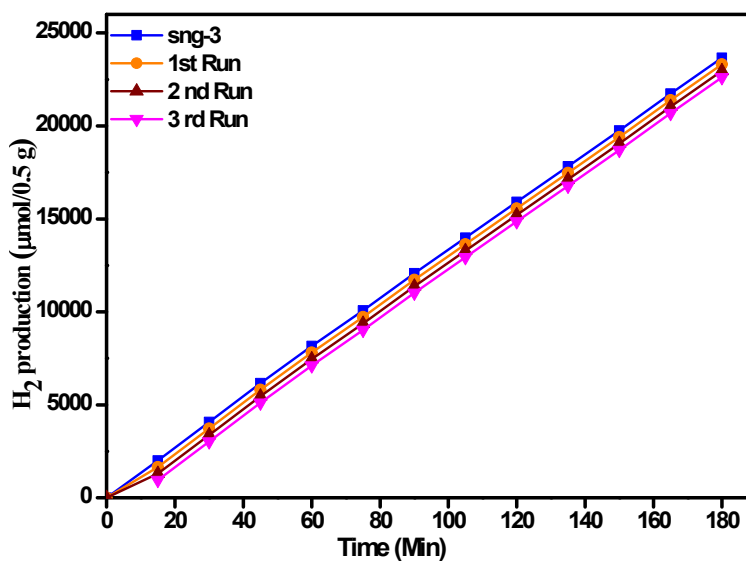

Figure ESI -1 Photocatalytic hydrogen production from  $\text{H}_2\text{S}$  splitting reaction using 3% graphene/ $\text{Sn}_3\text{O}_4$  (Sng-3) and reusability

---

Figure ESI -2

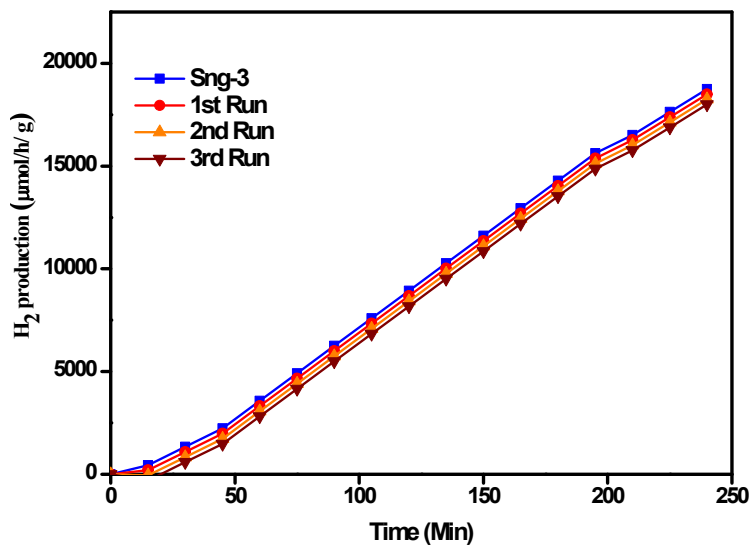

Figure ESI -2 Photocatalytic hydrogen production from water splitting reaction using 3% graphene/Sn<sub>3</sub>O<sub>4</sub> (Sng-3) and reusability

ESI Table 1 Reusability study of Photocatalytic hydrogen evolution *via* water and H<sub>2</sub>S splitting.

| Sr. No. | Sample code         | H <sub>2</sub> evolution rate from water (µmol h <sup>-1</sup> g <sup>-1</sup> ) | H <sub>2</sub> evolution rate from H <sub>2</sub> S (µmol h <sup>-1</sup> g <sup>-1</sup> ) |
|---------|---------------------|----------------------------------------------------------------------------------|---------------------------------------------------------------------------------------------|
| 1       | Sng-3               | 4687                                                                             | 7887                                                                                        |
| 2       | 1 <sup>st</sup> Run | 4300                                                                             | 7733                                                                                        |
| 3       | 2 <sup>nd</sup> Run | 4150                                                                             | 7571                                                                                        |
| 4       | 3 <sup>rd</sup> Run | 4050                                                                             | 7162                                                                                        |

**ESI table 2 Comparison Data of H<sub>2</sub> generation:**

| <b>Sr. No</b> | <b>Photocatalyst material</b>                      | <b>Light source used</b>        | <b>Hydrogen evolution Via H<sub>2</sub>O (μmol/h)</b> | <b>Hydrogen evolution Via H<sub>2</sub>S (μmol/h)</b> | <b>References</b>            |
|---------------|----------------------------------------------------|---------------------------------|-------------------------------------------------------|-------------------------------------------------------|------------------------------|
| <b>01</b>     | <b>Sn<sub>3</sub>O<sub>4</sub>@Graphene</b>        | Natural sunlight                | <b>4687 μmol h<sup>-1</sup>g<sup>-1</sup></b>         | <b>7887 μmol h<sup>-1</sup>g<sup>-1</sup></b>         | <b>Current Work</b>          |
| 02            | N doped Sn <sub>3</sub> O <sub>4</sub>             | Natural sunlight                | 654.33 μmol h <sup>-1</sup> 0.1g <sup>-1</sup>        | Not done                                              | <i>Kale et al.</i>           |
| 03            | Sn <sub>3</sub> O <sub>4</sub> /N-TiO <sub>2</sub> | 300 W Xe lamp                   | 32 μmol h <sup>-1</sup> 0.1g <sup>-1</sup>            | Not done                                              | <i>Xin Yu et al [01]</i>     |
| 04            | Sn <sub>3</sub> O <sub>4</sub> /TiO <sub>2</sub>   | 300 W Xe arc lamp               | 83.5 μmol h <sup>-1</sup> 0.2g <sup>-1</sup>          | Not done                                              | <i>Chen et al [02]</i>       |
| 05            | Sn <sub>3</sub> O <sub>4</sub>                     | 300 W Xe arc lamp               | 40 μmol h <sup>-1</sup> 0.3g <sup>-1</sup>            | Not done                                              | <i>Manikandan et al [03]</i> |
| 06            | Sn <sub>3</sub> O <sub>4</sub> /rGO                | commercial solar simulator 300W | 20 μmol h <sup>-1</sup> 0.1g <sup>-1</sup>            | Not done                                              | <i>Zhao et al [04]</i>       |
